# Supplementary material
Source: Springer Nature journal article supplement (https://www.springermedizin.de/resource/supplementary/13045_2013_355_MOESM7_ESM.pdf/9661200)
Supplement: MOESM7 [file 9661200]

## Additional file 7

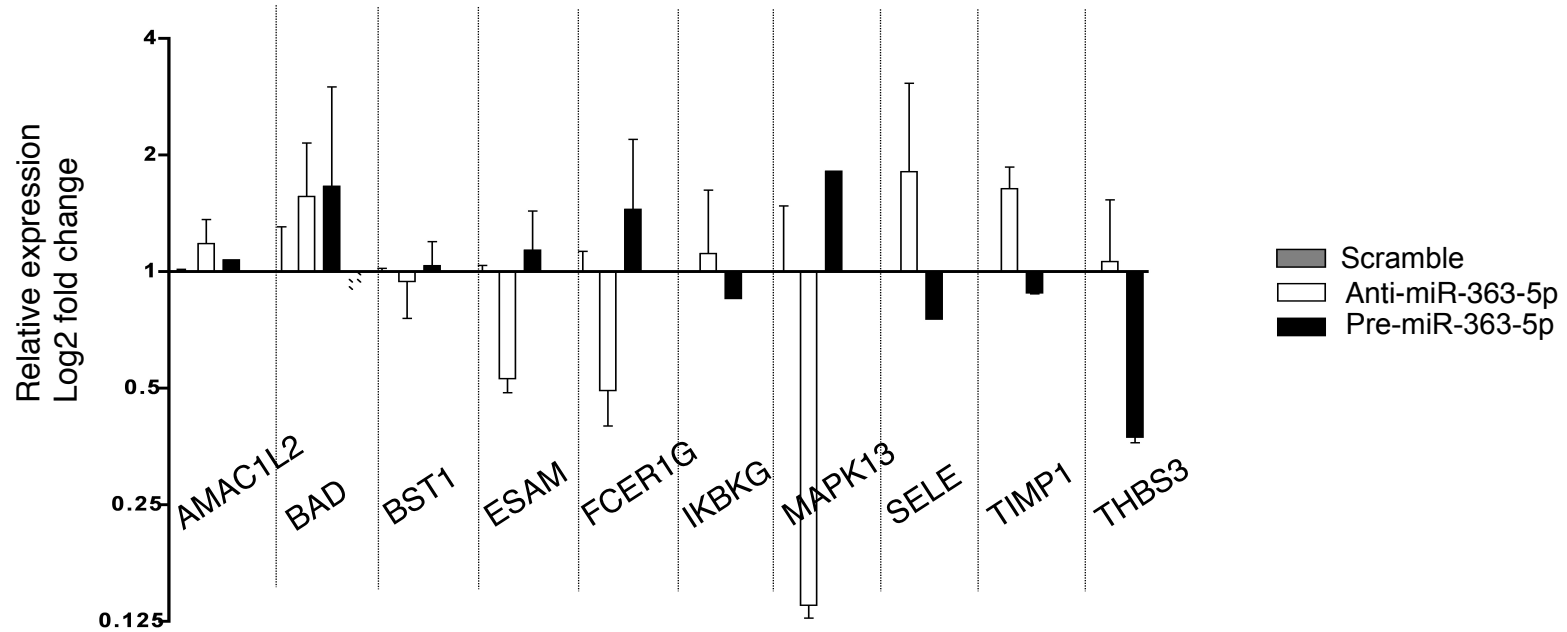

**Additional file 7 - Validation of transcriptomic data (Affymetrix microarrays) by qRT-PCR.** Ten genes were selected for validation based on pathways analyses using the Ingenuity software. Graph shows expression levels (log2 fold change) of selected genes in endothelial cells 48h post-transfection with anti-miR-363-5p or pre-miR-363-5p normalized to scramble control. Error bars represent s.e.m. of normalized expression mean from three independent transfection experiments .
